# Supplementary material for: Interview-based sighting histories can inform regional conservation prioritization for highly threatened cryptic species
Source: PubMed Central journal article supplement — J Appl Ecol. 2014 Dec 18;52(2):422–33. doi: 10.1111/1365-2664.12382 (PMC4407913; doi:10.1111/1365-2664.12382), 2014-12-18
Supplement: jpe0052-0422-sd2.pdf [file jpe0052-0422-sd2.pdf]

**Turvey et al, Interview-based sighting histories Supporting information S2:**

**Survey questionnaires (English and Vietnamese versions)**

## Datasheets for interviews about ungulate species in the Annamite Mountains (1 person being interviewed → 1 datasheet)

|                                                                                                                                                                                                                                                                                                  |               |              |              |                       |                              |          |           |                   |
|--------------------------------------------------------------------------------------------------------------------------------------------------------------------------------------------------------------------------------------------------------------------------------------------------|---------------|--------------|--------------|-----------------------|------------------------------|----------|-----------|-------------------|
| Province.....                                                                                                                                                                                                                                                                                    | District..... | Commune..... | Village..... | Date...../...../..... | Interviewee code.....        | Age..... | Sex ..... | Ethnic group..... |
| All interview researchers:.....                                                                                                                                                                                                                                                                  |               |              |              |                       | Department/Organization..... |          |           |                   |
| How do you know this person?(knowing that he knew about animals/the forest <input type="checkbox"/> about sao la <input type="checkbox"/> met randomly <input type="checkbox"/> Did you know that he had seen Saola before you met him? yes <input type="checkbox"/> no <input type="checkbox"/> |               |              |              |                       |                              |          |           |                   |

1) We are collecting information about forest animals for a research project. To help us understand better about the information we would like to ask you a few questions about wild animals and your knowledge and your use of the forest. We will follow two principles in the process of project implementation. First we will not disclose any information about interviewees which would allow anyone to identify them; for this reason we will not write your name on this datasheet and well not give any information to anyone which would allow them to identify you. Second we want to know that you are willing to participate in this interview. If you do not want to answer any particular question we will not force you to answer.

Do you agree to participate in this interview? Yes  / no

### 2) Animals you have seen:

- Please fill in all questions. Do not leave any box empty on this sheet. If they have never seen this species write 'not seen' on the datasheet. If you did not ask that question, please write 'NA' (not asked). If you asked byt they did not answer, please write 'DNA' (Did not answer). If they answered that they did not know or could not remember, please write 'DN' (Didn't know) on the datasheet.
- Write the time in the way which the interviewee gives it (e.g. 'in 2007', 'last year', 'before the war', 'when I was 23' etc).

| Species   | According to the interviewee |                          | Inter viewee definitely knows this species? | Has seen it?<br>(in the flesh, in the forest) | Last time he/she saw it (in the flesh)                       |                |               |              | Notes on THIS RECORD<br>(e.g. footprints, other people who saw it, etc).<br>Notes on the SPECIES write below. |            |
|-----------|------------------------------|--------------------------|---------------------------------------------|-----------------------------------------------|--------------------------------------------------------------|----------------|---------------|--------------|---------------------------------------------------------------------------------------------------------------|------------|
|           | Local name                   | 2-3 identification marks |                                             |                                               | Was when?<br>(write in the same way the interviewee says it) | = was caught?  | Was where?    |              |                                                                                                               |            |
|           |                              |                          |                                             |                                               |                                                              |                | name of place | co-ordinates |                                                                                                               | radius /km |
| Sambar    |                              |                          | yes<br>no                                   | yes<br>no                                     |                                                              | yes<br>no<br>? |               |              |                                                                                                               |            |
| Serow     |                              |                          | yes<br>no                                   | yes<br>no                                     |                                                              | yes<br>no<br>? |               |              |                                                                                                               |            |
| Saola     |                              |                          | yes<br>no                                   | yes<br>no                                     |                                                              | yes<br>no<br>? |               |              |                                                                                                               |            |
| Muntjac 1 |                              |                          | yes<br>no                                   | yes<br>no                                     |                                                              | yes<br>no<br>? |               |              |                                                                                                               |            |
| Muntjac 2 |                              |                          | yes<br>no                                   | yes<br>no                                     |                                                              | yes<br>no<br>? |               |              |                                                                                                               |            |
| Muntjac 3 |                              |                          | yes<br>no                                   | yes<br>no                                     |                                                              | yes<br>no<br>? |               |              |                                                                                                               |            |
| Mousedeer |                              |                          | yes<br>no                                   | yes<br>no                                     |                                                              | yes<br>no<br>? |               |              |                                                                                                               |            |

| Village..... Date...../...../..... Interviewee code..... |                              |                          |                                            |                                             |                                                              |                |                                                           |  |  |                                                                                                            |
|----------------------------------------------------------|------------------------------|--------------------------|--------------------------------------------|---------------------------------------------|--------------------------------------------------------------|----------------|-----------------------------------------------------------|--|--|------------------------------------------------------------------------------------------------------------|
| Species                                                  | According to the interviewee |                          | Interviewee definitely knows this species? | Has seen it? (in the flesh, in the forest ) | Last time he/she saw it (in the flesh)                       |                |                                                           |  |  | Notes on THIS RECORD (e.g. footprints, other people who saw it, etc).<br>Notes on the SPECIES write below. |
|                                                          | Local name                   | 2-3 identification marks |                                            |                                             | Was when?<br>(write in the same way the interviewee says it) | = was caught   | Was where?<br>name of place    co-ordinates    radius /km |  |  |                                                                                                            |
| Rhinoceros                                               |                              |                          | yes<br>no                                  | yes<br>no                                   |                                                              | yes<br>no<br>? |                                                           |  |  |                                                                                                            |
| Elephant                                                 |                              |                          | yes<br>no                                  | yes<br>no                                   |                                                              | yes<br>no<br>? |                                                           |  |  |                                                                                                            |
| Gaur                                                     |                              |                          | yes<br>no                                  | yes<br>no                                   |                                                              | yes<br>no<br>? |                                                           |  |  |                                                                                                            |
| Wild pig 1 commoner type                                 |                              |                          | yes<br>no                                  | yes<br>no                                   |                                                              | yes<br>no<br>? |                                                           |  |  |                                                                                                            |
| Wild pig 2 rarer type                                    |                              |                          | yes<br>no                                  | yes<br>no                                   |                                                              | yes<br>no<br>? |                                                           |  |  |                                                                                                            |
| Other kind of ungulate                                   |                              |                          | yes<br>no                                  | yes<br>no                                   |                                                              | yes<br>no<br>? |                                                           |  |  |                                                                                                            |

3) If this interviewee says they know 2 types of wild pig: How do they describe the difference between the 2 types. Does he/she think that one type is the male and the other the female of a single species, or does he/she really think they are two separate species. Do the two kinds like in one place or are they found in different places and habitats?

4) Notes on interesting species e.g. rhinoceros, Saola, types of muntjac or pig which might be new species, elephant, gaur.

If he/she saw these species was it only one time? If not, how many times? Information about places where it was seen, what was it doing...

5. In your opinion, what kinds of mammals have been completely lost (no more seen or caught) since you first started going to the forest (describe the species and the time since when no more were seen)

6. In your opinion, other than those species, which species are the rarest in the forest?

7. In your opinion, other than those species, which species have become rarer (seen less often) in the last 10 years (describe)

8. In your opinion why have those species declined or been lost?

9. In your opinion, is there any species which has not declined (there are the same number or more of them as 10 years ago)? Which species?

10. In your opinion, has wild pig declined, increased or state the same compared to the number 10 years ago?      declined       increased       the same

11. . In your opinion, has red muntjac/common muntjac declined, increased or state the same compared to the number 10 years ago?      declined       increased       the same

12. What was the last time you saw hunters from another area in the forest? (people from other provinces coming...)

13. Does the interviewee keep any bones of animals in his/her house? If so, you could look for specimens of Saola or the rarer wild pig.

14. *After the interview finished*

How is the interviewee's knowledge about forest animals? Very good , Good , Average , Below average , Knows little ,

15. Please write notes about whether you think the information given by the interviewee is accurate? (for example, did he/she change what he/she had said how was their attitude? Had he/she drunk something? If you don't write anything in this box the information from this interview will be given the lowest score.

## Phiếu phỏng vấn loài thú móng vuốt núi Trường Sơn (1 người được phỏng vấn → 1 phiếu)

|                                                                                                                                                                                                                                                                                                 |            |         |           |                       |                                 |           |                 |              |  |
|-------------------------------------------------------------------------------------------------------------------------------------------------------------------------------------------------------------------------------------------------------------------------------------------------|------------|---------|-----------|-----------------------|---------------------------------|-----------|-----------------|--------------|--|
| Tỉnh.....                                                                                                                                                                                                                                                                                       | Huyện..... | Xã..... | Thôn..... | Ngày...../...../..... | Người được phỏng vấn mã số..... | Tuổi..... | Giới tính ..... | Dân Tộc..... |  |
| Những người nghiên cứu làm phỏng vấn:.....                                                                                                                                                                                                                                                      |            |         |           |                       | Cơ quan/tổ chức.....            |           |                 |              |  |
| Bạn biết người này như thế nào?(do biết anh ta hiểu về rừng/thú <input type="checkbox"/> về sao la <input type="checkbox"/> gặp tình cơ <input type="checkbox"/> bạn có biết anh ta đã nhìn thấy sao la trước khi bạn gặp anh ta không? có <input type="checkbox"/> k° <input type="checkbox"/> |            |         |           |                       |                                 |           |                 |              |  |

1) Chúng tôi thu thập các thông tin về động vật rừng cho dự án nghiên cứu. Nhằm giúp cho chúng tôi hiểu rõ hơn về các thông tin, chúng tôi xin được hỏi bạn một số câu hỏi chung về động vật hoang dã và các kiến thức của bạn và việc sử dụng rừng. Chúng tôi sẽ tuân thủ hai nguyên tắc trong quá trình thực hiện dự án. Thứ nhất, Chúng tôi sẽ không tiết lộ thông tin người được phỏng vấn cho bất kỳ ai nên sẽ không ghi tên bạn vào phiếu này và sẽ không cung cấp thông tin bạn cung cấp cho bất kỳ ai để họ xác định được bạn. Thứ hai là chúng tôi muốn biết bạn có sẵn sàng tham gia cuộc phỏng vấn này không. Nếu bạn không muốn trả lời bất kỳ câu hỏi nào thì chúng tôi không bắt buộc bạn phải trả lời.

**Bạn có đồng ý tham gia cuộc phỏng vấn này không? Có  / không**

### 2) Động vật đã nhìn thấy:

- Hãy điền vào tất cả các câu hỏi. Không để trống một ô nào trong phiếu này. Nếu họ chưa bao giờ nhìn thấy loài này hãy viết vào phiếu '**chưa thấy**', Nếu bạn không hỏi câu hỏi này hãy viết vào phiếu '**KH**'. Nếu bạn hỏi mà họ không trả lời hãy viết vào phiếu '**KTL**'. Nếu họ trả lời là họ không biết/không nhớ hãy viết vào phiếu '**KB**'.
- Ghi thời gian theo cách mà người được phỏng vấn đưa ra (ví dụ. '**năm 2007**', '**năm ngoái**', '**trước chiến tranh**', '**khi tôi 23 tuổi**', vv...)

| Loài      | Theo người được phỏng vấn |                        | Chắc chắn n.đ.p.v. có biết loài này không? | Đã nhìn thấy? (trực tiếp, trong rừng) | Lần cuối cùng nhìn thấy (trực tiếp)                   |           |                                                         | Các nhận xét khác về GHI NHẬN này (ví dụ: dấu vết, người khác nhìn thấy, v.v....<br><b>Ghi chú về LOÀI viết ở dưới</b> |  |
|-----------|---------------------------|------------------------|--------------------------------------------|---------------------------------------|-------------------------------------------------------|-----------|---------------------------------------------------------|------------------------------------------------------------------------------------------------------------------------|--|
|           | Tên địa phương            | 2-3 đặc điểm đặc trưng |                                            |                                       | là khi nào? (Ghi theo cách mà người phỏng vấn đưa ra) | = bị bắt? | là ở đâu?<br>tên địa điểm      tọa độ      bán kính /km |                                                                                                                        |  |
| Nai       |                           |                        | có k°                                      | có k°                                 |                                                       | có k° ?   |                                                         |                                                                                                                        |  |
| Son dương |                           |                        | có k°                                      | có k°                                 |                                                       | có k° ?   |                                                         |                                                                                                                        |  |
| Saola     |                           |                        | có k°                                      | có k°                                 |                                                       | có k° ?   |                                                         |                                                                                                                        |  |
| Mang 1    |                           |                        | có k°                                      | có k°                                 |                                                       | có k° ?   |                                                         |                                                                                                                        |  |
| Mang 2    |                           |                        | có k°                                      | có k°                                 |                                                       | có k° ?   |                                                         |                                                                                                                        |  |
| Mang 3    |                           |                        | có k°                                      | có k°                                 |                                                       | có k° ?   |                                                         |                                                                                                                        |  |
| Cheo cheo |                           |                        | có k°                                      | có k°                                 |                                                       | có k° ?   |                                                         |                                                                                                                        |  |

| Thôn..... Ngày...../...../..... Người được phỏng vấn mã số..... |                           |                        |                                            |                                       |                                                       |           |                                                         |  |                                                                                                                        |
|-----------------------------------------------------------------|---------------------------|------------------------|--------------------------------------------|---------------------------------------|-------------------------------------------------------|-----------|---------------------------------------------------------|--|------------------------------------------------------------------------------------------------------------------------|
| Loài                                                            | Theo người được phỏng vấn |                        | Chắc chắn n.đ.p.v. có biết loài này không? | Đã nhìn thấy? (trực tiếp, trong rừng) | Lần cuối cùng nhìn thấy (trực tiếp)                   |           |                                                         |  | Các nhận xét khác về GHI NHẬN này (ví dụ: dấu vết, người khác nhìn thấy, v.v....<br><b>Ghi chú về LOÀI viết ở dưới</b> |
|                                                                 | Tên địa phương            | 2-3 đặc điểm đặc trưng |                                            |                                       | là khi nào? (Ghi theo cách mà người phỏng vấn đưa ra) | = bị bắt? | là ở đâu?<br>tên địa điểm      tọa độ      bán kính /km |  |                                                                                                                        |
| Tê giác                                                         |                           |                        | có k°                                      | có k°                                 |                                                       | có k° ?   |                                                         |  |                                                                                                                        |
| Voi                                                             |                           |                        | có k°                                      | có k°                                 |                                                       | có k° ?   |                                                         |  |                                                                                                                        |
| Bò tót                                                          |                           |                        | có k°                                      | có k°                                 |                                                       | có k° ?   |                                                         |  |                                                                                                                        |
| Lợn rừng 1 loài thương hơn                                      |                           |                        | có k°                                      | có k°                                 |                                                       | có k° ?   |                                                         |  |                                                                                                                        |
| Lợn rừng 2 loài hiếm hơn                                        |                           |                        | có k°                                      | có k°                                 |                                                       | có k° ?   |                                                         |  |                                                                                                                        |
| Loài thú móng guốc khác                                         |                           |                        | có k°                                      | có k°                                 |                                                       | có k° ?   |                                                         |  |                                                                                                                        |

3) Nếu người được hỏi có thể phân biệt 2 dạng lợn rừng, làm thế nào để họ mô tả sự khác nhau giữa hai dạng trên? Anh ta có nghĩ đây có thể là con đực hoặc con cái của cùng một loài hay không, hay họ xác định đây là hai loài riêng biệt? Các dạng khác nhau này có sống một nơi hay không, hay là ở các sinh cảnh, địa điểm khác nhau?

4) **Ghi chú các loài quan tâm** ví dụ: tê giác, sao la, loài mang hoặc lợn mà có thể là loài mới, voi, bò tót...

Nếu đã nhìn thấy các loài này, có phải họ thấy một lần hay không? Nếu không, bao nhiêu lần? Các thông tin bất kỳ về địa điểm đã nhìn thấy, họ đang làm gì....

Thôn..... Ngày...../...../..... **Người được phỏng vấn mã số.....**

5. Theo ý bạn, Loài thú nào đã hoàn toàn biến mất (không còn bắt gặp nữa) kể từ khi bạn bắt đầu đi rừng? (mô tả loài đó và thời điểm bạn cho rằng nó hoàn toàn không còn được trông thấy)
6. Theo ý bạn, Ngoài trừ những loài đó, loại thú nào hiếm nhất trong rừng?
7. Theo ý bạn, Ngoài trừ những loài đó, loài thú nào đã trở nên hiếm hơn (ít được nhìn thấy hơn) trong vòng 10 năm qua? (mô tả)
8. Theo ý bạn, Tại sao (những) loài thú đó đã suy giảm hoặc biến mất hoàn toàn?
9. Theo ý bạn, Có loài nào không suy giảm? (có số lượng bằng nhau hoặc nhiều hơn 10 năm trước đây)? Loài nào?
10. Theo ý bạn, lợ rừng hiện nay suy giảm, tăng lên hay vẫn giữ nguyên về số lượng như 10 năm trước đây?      SG     TL     VGN
11. Theo ý bạn, loài Mang Đỏ (=Mang Thương, = Hoẵng) hiện nay suy giảm, tăng lên hay vẫn giữ nguyên về số lượng như 10 năm trước đây?      SG     TL     VGN
12. Lần cuối cùng bạn gặp những thợ săn đến từ vùng khác trong rừng là khi nào? (người dân từ tỉnh khác đến...)
13. Người phỏng vấn có lưu giữ các xương của các loài động vật rừng không? Nếu có, cố gắng tìm dấu tích saola hay lợ rừng quý hiếm.
14. *Sau khi kết thúc phỏng vấn*  
Kiến thức về động vật rừng của người được phỏng vấn là như thế nào? Rất tốt , Tốt , Trung bình , Dưới trung bình , Biết ít .
15. Xin hãy ghi chú về các thông tin người phỏng vấn có thật hay không? (ví dụ: họ có thay đổi câu chuyện của họ trong khi nói chuyện hay không; thái độ thế nào? đã uống gì chưa). Nếu bạn không ghi chú thì xem như các thông tin đưa ra ở đây có giá trị thấp nhất
