# Supplementary material for: Interview-based sighting histories can inform regional conservation prioritization for highly threatened cryptic species
Source: PubMed Central journal article supplement — J Appl Ecol. 2014 Dec 18;52(2):422–33. doi: 10.1111/1365-2664.12382 (PMC4407913; doi:10.1111/1365-2664.12382), 2014-12-18
Supplement: jpe0052-0422-sd3.pdf [file jpe0052-0422-sd3.pdf]

## Turvey et al, Interview-based sighting histories Supporting information S3:

### Ungulates of the Annamite region; key identification points for interview surveys

(English and Vietnamese versions included)

#### Pig species (Lợn/Heo)

As with muntjacs, pigs can be difficult to ask about. It is best to ask first about pigs and then to ask how many types there are. As far as science is concerned there is only one type of pig in the area, which may be called *Sus scrofa* or *Sus moupinensis* depending on the taxonomy used. However local people of different ethnic groups do frequently report two distinct types of pig. The situation is confused by the following points.

- 1) People can have different names for different sex/age categories of pigs. Adult male pigs tend to be solitary and are much larger than the females and young males who travel in groups. Very young pigs are striped. You can ask directly to check this. If someone says there are two (or more) kinds of pig ask if there are there males and females of *both* types.
- 2) Some people consider the hog-badger (*Arctonyx collaris*), a Carnivore with a long, flexible, pig-like nose, to be a kind of pig. Try asking 'what are the feet like?' A hog badger's feet are clawed, like a bear's. It also has a short bushy tail. Hog badgers are smaller than real adult pigs and never travel in groups.
- 3) Pigs are domesticated and domestic pigs can escape and run wild and can interbreed with wild pigs to produce odd-looking forms.
- 4) Pigs don't have any obvious, easily-describable features like horns or colour patterns. Different species of pig tend to look quite similar to untrained observers.

#### Main features:

- Length of snout
- Colour (as always, check with a visible, known object)
- Size of animal (relative to other pigs)
- White or pale markings on face or elsewhere.
- Travels in groups or is solitary.
- Fattiness of meat.
- Fangs (describe)
- Rarity
- Habitat.
- Seasonality of movement – are they found in different parts of the forest at different times of year.

#### Sambar (Nai)

##### Main features.

- Horns are branched (antlers) with 3 or more points on fully developed horns [but note that horns are shed every year and they grow their branches slowly so a young horn may have 2 or even just one branch]
- Males have horns females do not [does not separate from muntjacs]

- Much larger than muntjacs, about as tall as a cow.

#### **Other features**

Often in groups. Colour is nondescript, fairly dark dull brown. Tail is black above and white or yellow underneath. Patch of bare, or nearly bare skin on front of the neck. Not spotted. Horns are shed. Generally rare but formerly common – if an interviewee says sambar are common, he may be talking about muntjacs.

#### **Likely to be confused with**

Muntjacs – particularly Large-Antlered Muntjac.

## **Muntjac species (Mang/Hoẵng)**

Muntjacs are the most difficult of these species to ask about.

Science currently recognises 3 species of muntjac in the Annamites. However the true number is uncertain. There may be more than one species of small dark muntjac.

Our experience so far suggests that most local people will group these muntjacs together as different kinds of the same thing, the same as scientists do. However they don't necessarily have consistent names for them. A dark muntjac which lives in the deep forest might be called 'dark muntjac' by some people in the village and 'deep forest muntjac' by others.

The best way to ask about muntjacs is to first ask about muntjacs in general and then ask how many kinds there are and then ask people to describe those different kinds. But be careful; people do not necessarily recognise the same kinds as we do. In addition, other species – especially mousedeer but also, perhaps, hog deer – can be classified as muntjacs by local people. It isn't always obvious when this is happening especially if these species (mousedeer and hog deer) are now rare or extinct locally and people cannot remember them well enough to describe them accurately.

For this reason, the datasheet simply asks for 'Mang 1, Mang 2, Mang 3, Mang 4'. You should list all the kinds of muntjac which the interviewee recognises and describe them as he/she describes them.

But you still need to know the features which are useful for distinguishing species.

#### **Main features**

- Colour. As always when asking about colour, ask people to refer to something else, preferably a visible object. Muntjacs are likely to be reddish, dark greyish/blackish/brownish or nondescript grey-brown.
- Size of animal. Relative to other muntjac species.
- Which sexes have antlers? Males, females or both, or neither.
- Habitat. Old forest/young forest. Near the village and farms or far from villages.

#### **Other features.**

- Fangs. Are fangs present? Are they present in females? [this is actually a very useful feature but most people probably won't remember]
- Antler size. Relative to other muntjac species and to sambar.
- Branched horns (antlers) [Muntjacs have 1 or 2 points on their antlers but hog-deer have 3].

**Muntjac species are likely to be confused with:** 1) each other, 2) mousedeer, 3) hog deer, 4) sambar.

## Hog deer

**NB:** This species is probably extinct in the area and, unlike rhinoceros, we don't think it is likely that interviews could reveal its presence. For this reason it is not on the datasheet. However it is possible that some interviewees will remember and describe this species so you should be aware of it.

### Main features.

- Mature antlers have 3 points, in the male but are smaller than sambar antlers.
- Intermediate in size between muntjacs and sambar.

**Other features.** Found in grassy areas near rivers. May have white spots, but not necessarily, Shape of body, as well as size, seems intermediate between muntjacs and sambar. Often, but not necessarily, found in groups.

**Likely to be confused with:** Muntjacs and Sambar. If anyone does remember hog deer they are very likely to classify it as a kind of muntjac or as a kind of sambar.

## Mousedeer/Chevrotain (Cheo cheo)

### Main features.

- Very small size, similar to rabbit or cat or large rat.
- Footprints are like those of muntjacs but much smaller (perhaps 1 or 2 cm – you can draw a footprint on paper if it helps)
- No horns/antlers.

**Likely to be confused with:** Muntjac species.

**NB:** 2 species of mousedeer may occur in the area. However we think it unlikely that interview surveys can distinguish them. If an interviewee does tell you there are two species of mousedeer you can ask about the colour of the animals' backs and about the habitat they are found in.

## Serow (Sơn Dương)

### Main features

- Horns short (about 20cm) and strongly curved backwards.
- Males and females have horns.
- Dark colour – almost black.

### Other features.

Found in steep slopes and rocky places. Fairly large size (bigger than muntjacs but smaller than sambar). Not found in groups. Horns are not shed. Shaggy hair. Mane on the neck, like a horse. Remains relatively common in some places.

**Likely to be confused with:**

Saola

## Saola (Sao La)

### Main features

- Horns long (about 50 cm) quite straight and parallel but with a slight backward curve.
- Clear white markings on face.
- White markings on ankles and on tail, but not on body.

### Other features.

Dark colour (but warmer, browner, than serow). Large flap of skin on each side of face (which conceals a gland). Generally very rare now and found in deep forest.

### Likely to be confused with:

Serow

## Gaur (Bò tót)

### Main features:

- Large size – at least as large as domestic cattle.
- Lower half of the leg is white.
- Horns thick and curving inward.

**Other features:** Dark colour. In form very similar to cow or buffalo. Generally rare. Often come out onto grassy or open places in forest. Often in groups.

NB: There are other species of wild cattle in Southeast Asia: Banteng, Kouprey and Wild Water Buffalo. We don't expect any of these to occur in recent memory in the area for this survey. But if someone does claim there is more than one type of wild cattle, ask about the colour of the buttocks, the general colour of the females and the shape of the horns.

## Rhinoceros (Tê Giác)

### Main features.

Although rhinoceros are very distinctive, they have been extinct in most of the landscape for such a long time, and there are many myths and stories about them. Make sure that people are talking about a real animal that they remember seeing and that they have not confused it with something else.

Because rhinoceros are so rare, and because their footprints are distinctive – it is worth recording information about footprints but make it very clear that this is what you are doing.

- Large size (larger than cow or gaur but smaller than elephant)
- Horns on the nose (not on top of the head)
- Grey and wrinkled skin like elephant
- Very large footprints with clear toes (you can ask them to draw the footprint)
- Likes to wallow in muddy pools, like pigs.

NB: There are two species of rhinoceros in the area but it's unlikely that the interviewee will tell them apart unless he has seen the animal well and recently. If he has done this, get all the information you can!

## **Elephant (Voi)**

**Main features.** Actually you don't have to get people to describe elephants. This is probably the only animal for which misidentification is unlikely.

# CÁC LOÀI THÚ MÔNG QUỐC KHU VỰC TRƯỞNG SƠN: NHỮNG ĐẶC ĐIỂM XÁC ĐỊNH

## CÁC LOÀI LỢN

Cũng như các loài mang, rất khó để hỏi thông tin về các loài lợn. Cách tốt nhất để thu thập thông tin về các loài lợn là đầu tiên hỏi về có biết loài lợn rừng không; sau đó hỏi có bao nhiêu dạng lợn trong khu vực? Các nhà khoa học đề cập là chỉ có một loài lợn duy nhất trong khu vực gọi là *Sus scrofa* hay *Sus moupinensis* tùy theo hệ thống phân loại được sử dụng. Tuy nhiên những người địa phương thuộc các dân tộc khác nhau thì thường ghi nhận hai loài lợn khác nhau. Hỏi về lợn rừng là khó do những nguyên nhân sau

- 1) Người dân gọi tên các loài lợn khác nhau là do sự khác nhau về giới tính/tuổi của chúng. Lợn đực trưởng thành thường sống đơn độc và lớn hơn lợn cái và lợn nhũ bị đực thường sống theo đàn. Lợn con non thì thường có các dải màu sọc. Bạn có thể hỏi những câu hỏi trực tiếp để kiểm tra điều này. Nếu ai đó nói có 2 dạng lợn (hoặc nhiều hơn), thì hãy về cá thể đực và cá thể cái của mỗi dạng.
- 2) Nếu ai đó đề cập đến loài lửng lợn (*Arctonyx collaris*), một loài thú ăn thịt, có đặc điểm chiều dài, hình dáng, mũi giống lợn rừng được xác định là một loài lợn. Hãy cố gắng hỏi 'chân nó như thế nào'? Một con lửng lợn chân có móng, giống như con gấu. Đuôi của lửng lợn cũng ngắn và có lông rậm. Lửng lợn có kích thước nhỏ hơn lợn rừng trưởng thành và không bao giờ sống theo đàn.
- 3) Lợn nhà và lợn rừng được nuôi thuần hóa có thể sống chuồng và sống hoang dã sau đó giao phối với lợn rừng, sau đó cho ra một dạng lợn lai
- 4) Các loài lợn rừng có ít đặc điểm khác biệt rõ ràng, dễ mô tả như sừng hay màu lông. Các loài lợn khác nhau lại trông giống giống nhau, làm cho người ta khó phân biệt

### Đặc điểm chính

- Chiều dài mỏm
- Màu lông
- Kích cỡ (các loài lợn khác nhau có kích cỡ khác nhau)
- Lang trắng hay lang đen trên đầu hoặc ở các bộ phận khác
- Sống đơn độc hay theo bầy đàn
- Thịt nhiều nạc hay nhiều mỡ
- Răng nanh (mô tả)
- Độ hiếm gặp
- Sinh cảnh phân bố
- Di chuyển theo mùa chúng được nhìn thấy ở các nơi khác nhau trong rừng ở các thời điểm khác nhau trong năm không?

## NAI

### Đặc điểm chính:

- Sừng có nhánh (lộc) với 3 hoặc nhiều hơn 3 nhánh. (chú ý: sừng rụng hàng năm và các nhánh của chúng mọc ra chậm nên sừng non có thể có hai hoặc thậm chí là một nhánh)
- Con đực có sừng, con cái không có (Không phân biệt ở các loài mang)
- Kích thước lớn hơn nhiều so với mang, chiều cao bằng con bò

### Các đặc điểm khác

Thường sống theo bầy đàn. Màu lông khó mô tả khác biệt, lông màu nâu tối. Đuôi phía trên màu đen, phía dưới màu trắng hoặc vàng. Cằm không có hoặc ít có lông. Lông không có các chấm. Sừng rụng theo chu kì. Nói chung loài nai hiện nay hiếm thấy nhưng trước đây thì phổ biến.-nếu người được phỏng vấn nói nai là loài phổ biến thì có thể anh ta đang nhầm nai với mang

**khả năng nhầm lẫn :** Mang- cụ thể là loài Mang Lớn

## CÁC LOÀI MANG

Mang là một trong những nhóm loài rất khó hỏi các thông tin

Hiện tại các nhà khoa học ghi nhận có 3 loài mang ở khu vực dãy Trường Sơn. Tuy nhiên con số chính xác thì không chắc chắn. Có thể có hơn một loài mang đen

Theo kinh nghiệm của chúng tôi, hầu hết những người dân địa phương thường gộp 3 loài mang làm một và các dạng khác nhau của cùng một nhóm, như các nhà khoa học đã làm. Tuy nhiên họ không có một tên cụ thể nào cho mỗi dạng. Loài mang có màu lông tối sống trong rừng sâu có thể được gọi là 'mang đen' nhưng một số người khác lại gọi là 'mang rừng sâu'.

Cách tốt nhất để hỏi thông tin về các loài mang trước hết hỏi thông tin chung về mang, sau đó hỏi có bao nhiêu dạng sau đó và đề nghị mô tả các dạng khác nhau đó. Tuy vậy hãy cẩn thận người dân có thể không phân biệt được các loài mang như chúng ta. Hơn nữa người dân địa phương có thể xác định các loài khác như Hươu Vàng hay cheo cheo như là các loài mang. Điều này là không chính xác đặc biệt là khi những loài này Hươu Vàng và cheo cheo hiện nay trở nên hiếm thấy hoặc đã tuyệt chủng và vì thế mà người địa phương không nhớ rõ chúng và thông tin trở nên thiếu tính xác thực

Vì lý do này mà trong phiếu chúng ta phân loại "Mang 1, Mang 2, Mang 3, Mang 4". Bạn nên liệt kê tất cả các loài mang mà người được phỏng vấn có thể nhận ra và mô tả chúng

Nhưng bạn vẫn cần biết các đặc điểm để nhận xác định sự khác nhau của các loài

### Đặc điểm chính

- Màu sắc, điều luôn luôn gặp phải khi chúng ta hỏi về màu sắc để phân biệt một thứ này với thứ khác và nó luôn luôn là điều dễ dàng nhận ra Con mang có màu đỏ gạch, hơi xám tối, hơi nâu hoặc nâu xám
- Kích cỡ con vật. Liên hệ với kích cỡ các loài mang khác
- Mối quan hệ giữa giới tính và sừng? đực hay con cái có sừng? hay cả hai có sừng?
- Sinh cảnh phân bố, rừng rậm hay rừng thưa? gần làng bản, trang trại hay xa làng bản

### Đặc điểm khác

- Răng nanh, chúng có răng nanh không? Răng nanh ở con cái có hay không? (đây là đặc trưng rất hữu ích, nhưng hầu hết người ta ít chú ý đến điều này?)
- Kích thước sừng nhánh, so sánh với các loài mang khác nhau và loài nai như thế nào
- Số nhánh sừng: các loài mang có 1 hoặc 2 nhánh trên sừng chính nhưng loài hươu xạ có 3 nhánh

**Các loài mang có thể bị nhầm lẫn với các loài sau:** 1) các loài mang với nhau 2) Cheo cheo 3) Hươu Vàng 4) Nai

## HƯỢU VÀNG (AXIS PORCINUS)

Đây là loài có thể đã tuyệt chủng và không giống như tê giác, chúng tôi không nghĩ là có thể tìm được bất cứ thông tin gì về loài này. Vì lý do này mà nó không được đưa vào phiếu phỏng vấn. Tuy nhiên khi được hỏi, một số người có thể sẽ nhớ loài này và mô tả chúng, bạn nên lưu ý điều này

### Đặc điểm chính:

- Con đực có sừng có 3 nhánh, nhưng sừng nhỏ hơn sừng nai
- Sừng có kích thước giữa mang và nai

### Đặc điểm khác:

Tìm thấy ở vùng đồng cỏ ven sông, có thể có đốm trắng. Kích thước cơ thể cỡ trung trung giữa loài hoẵng và nai. Sống theo đàn

**Có thể nhầm lẫn với:** các loài mang hoặc nai. Nếu người được phỏng vấn đó còn nhớ loài Hươu Vàng, có thể họ sẽ xác định đó là một loài mang hoặc loài nai

## CHEO CHEO

### Đặc điểm chính:

- Kích thước nhỏ, tương đương như một con thỏ, mèo
- Dấu chân giống dấu chân mang nhưng nhỏ hơn. (có thể là 1cm hoặc 2cm-bạn có thể vẽ móng chân nó trên giấy)
- Không có sừng

**Có thể nhầm lẫn với:** nhầm lẫn với các loài mang

- Trong khu vực Trương Sơn có tới 2 loài cheo cheo. Tuy nhiên chúng ta nghĩ điều này là khó có thể xảy ra người được phỏng vấn có thể nhận ra và mô tả sự khác nhau giữa chúng. Nếu họ nói với bạn rằng trong 1 khu vực có tới 2 loài cheo cheo, hãy hỏi lông của chúng trên lưng như thế nào, khu vực họ nhìn thấy ở đâu

## SƠN DƯƠNG

### Đặc điểm chính:

- Sừng ngắn (khoảng 20 cm) cong về phía sau
- Cả con đực lẫn cái đều có sừng
- Màu tối, thường là màu đen

### Đặc điểm khác:

Tìm ở nơi có địa hình dốc, có núi đá cao. Kích thước khá lớn (lớn hơn con mang nhưng nhỏ hơn con nai). Không sống theo đàn, sừng không rụng theo chu kì, lông bờm sau cổ giống như ngựa. Vẫn còn thấy nhiều ở một số nơi

**Có thể nhầm lẫn với:** loài sao la

## SAOLA

### Đặc điểm chính:

- Sừng dài (khoảng 50cm) sừng thẳng, và song song, hơi vượt cong về phía sau
- Có lang trắng trên mặt
- Có lang trắng ghót chân và đuôi nhưng không có lang trắng trên cơ thể

### Đặc điểm khác:



- Màu lông tối (lông nhạt hơn sơn dương). Mỗi bên mặt có vạt lông lớn. nói chung loài này rất hiếm bắt gặp, chỉ sống trong rừng sâu

**Thường nhầm lẫn với:** loài sơn dương

## BÒ TỐT

**Đặc điểm chính:**

- Có kích thước to lớn, ít nhất lớn hơn hoặc bằng trâu
- Một nửa chân phía dưới có màu trắng
- Sừng dày, uốn cong vào phía trong

**Đặc điểm khác:**

- Màu tối, to gần giống như trâu, bò. Nói chung là quý hiếm. Thường ra ăn ở vùng cỏ ở những khoảng trống trong rừng. thường đi theo đàn

Có các loài trâu bò hoang khác nhau ở vùng đông Nam Á như Bò Rừng (*Bos banteng*), Bò Xám (*Bos sauvellei*) và Trâu Rừng (*Bubalus arnee*). Tại khu vực rừng sơn chúng ta không hy vọng tìm thấy các loài trên ngoại trừ bò tốt. Nhưng nếu ai đó nói rằng họ nhìn thấy con gì đó to to như con trâu, bò thì hãy hỏi màu lông của nó ở chân thế nào? Màu tổng thể của con cái và hình dáng sừng của chúng thế nào.

## TÊ GIÁC

Mặc dù tê giác là loài dễ nhận biết, từ lâu chúng đã gần như tuyệt chủng ở hầu như nhiều nơi. Tuy nhiên vẫn còn nhiều câu chuyện liên quan đến chúng. Phải đảm bảo rằng khi bạn hỏi, người ta nói chính xác về loài động vật mà họ nhớ là họ đã nhìn thấy. Và họ không nhầm lẫn loài này với loài khác. Như chúng ta đã biết, tê giác là loài động vật rất quý hiếm và cũng bởi dấu chân rất đặc trưng, dễ nhận biết cho nên việc tìm hiểu, ghi lại thông tin về dấu chân là rất quan trọng.

**Đặc điểm chính**

- Kích thước: (to hơn con bò nhưng nhỏ hơn con voi)
- Sừng ở trên mũi (không phải là trên đầu mũi)
- Dấu chân rất to, có dấu ngón chân rõ ràng (bạn có thể đề nghị người ta vẽ hình dáng ngón chân của nó)
- Thích ngâm mình trong bùn lầy ở ven đầm lầy, ven ao hồ giống như lợn

Có hai loài tê giác ở vùng đông nam á nhưng rõ ràng là người ta có thể nói nhiều hơn hay ít hơn 2 loài khi được phỏng vấn. Nếu vậy hãy hỏi người ta xem họ có thấy loài này một cách rõ ràng không? Gần đây họ có thấy không?. Nếu có thể, hãy thu thập tất cả những thông tin liên quan tới chúng

## VOI

**Đặc điểm chính:** Chúng ta không cần hỏi người dân mô tả loài voi.
